# Supplementary material
Source: PubMed Central journal article supplement (PMC2148403)

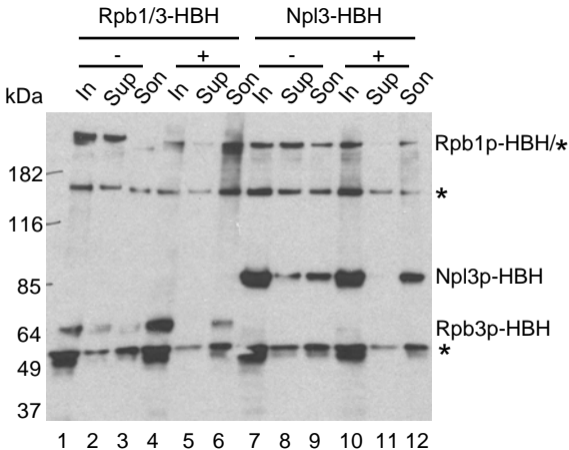

Supplement: pnas_0710179104_1.pdf [file pnas_0710179104_1.pdf]

# Yra2-TAP ChIP

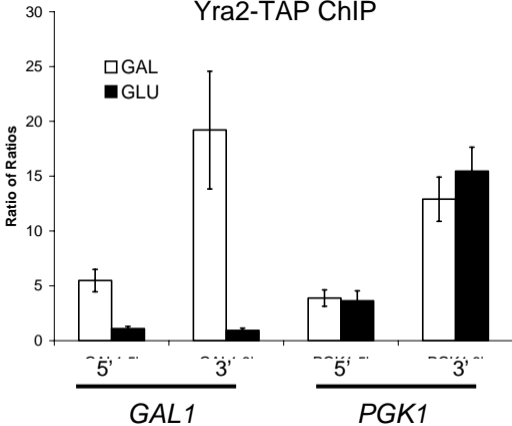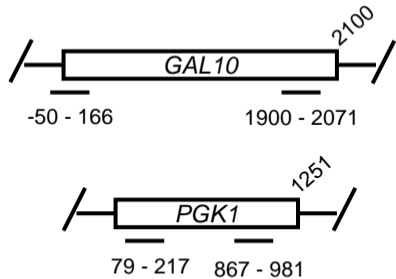

Supplement: pnas_0710179104_2.pdf [file pnas_0710179104_2.pdf]
